# Supplementary material for: Baveno VII Criteria Is an Accurate Risk Stratification Tool to Predict High-Risk Varices Requiring Intervention and Hepatic Events in Patients with Advanced Hepatocellular Carcinoma
Source: MDPI journal article supplement (doi:10.3390/cancers15092480), 2023-04-26
Supplement: s1 [file s1]

## Supplementary Figures

**Supplementary Figure S1: VNT according to BCLC stage**

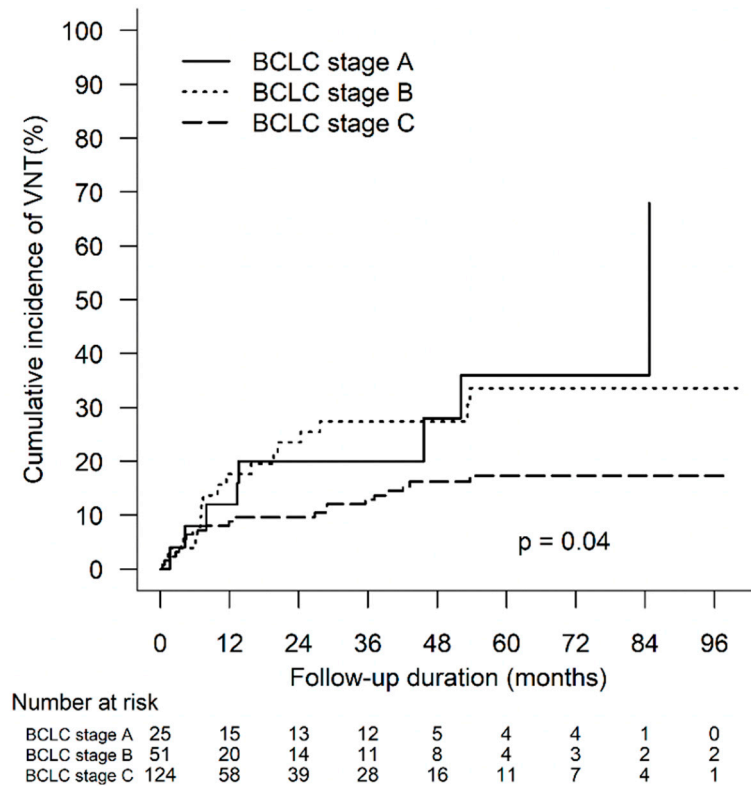

**Supplementary Figure S2: VNT according to whether patients received systemic therapy**

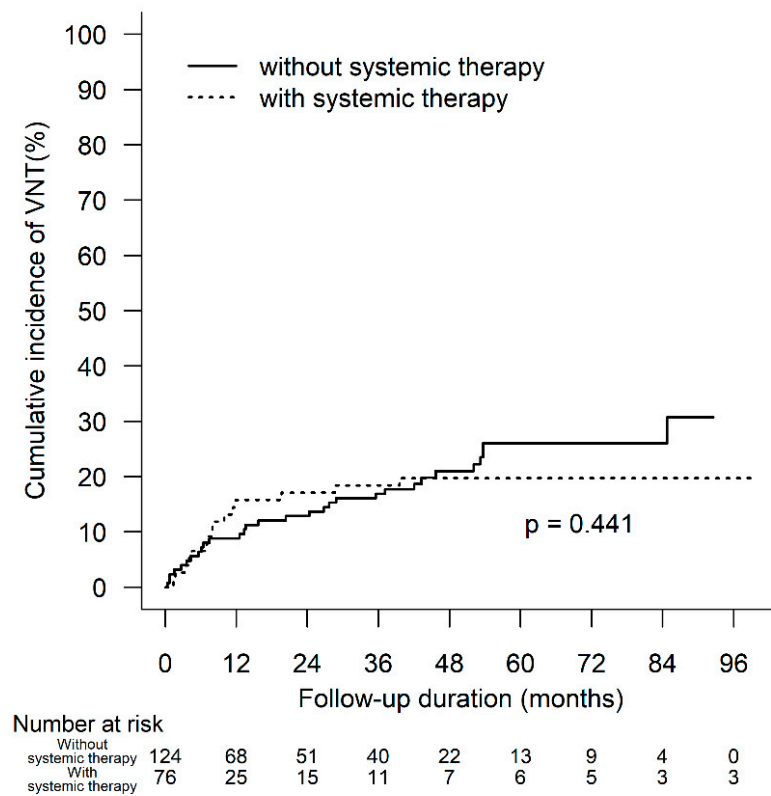

**Supplementary Figure S3: Bleeding events according to whether patients received systemic therapy**

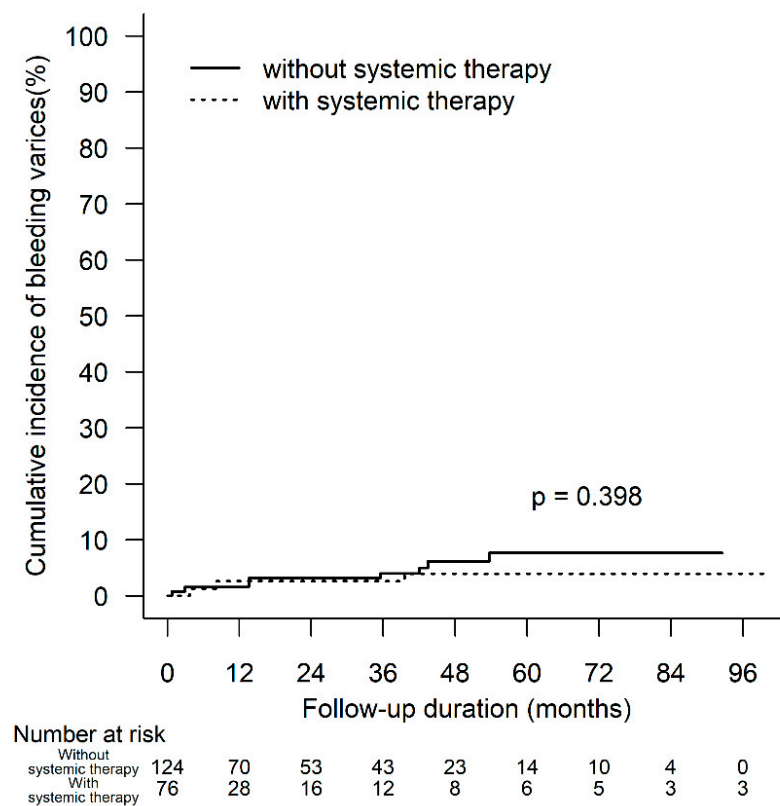

## Supplementary Tables

**Supplementary Table S1: Any HCC treatment before receiving systemic therapy**

|                                                     |            |
|-----------------------------------------------------|------------|
| Treatment received before systemic therapies (n=76) | 27 (35.5%) |
| Partial hepatectomy (not involving right side)      | 4 (14.8%)  |
| Partial hepatectomy (Right side)                    | 4 (14.8%)  |
| TACE                                                | 17 (63.0%) |
| RF ablation                                         | 2 (7.4%)   |

**Supplementary Table S2:** Alternative therapy given in subgroup of patients who did not receive systemic therapy

|                                                                       |            |
|-----------------------------------------------------------------------|------------|
| <b>Alternative therapy if systemic therapies not given: (n=124) ^</b> |            |
|                                                                       | 75 (60.5%) |
| Partial hepatectomy                                                   | 20 (16.1%) |
| TACE                                                                  | 49 (39.5%) |
| RF ablation                                                           | 6 (4.8%)   |
| No treatment/ palliative care                                         | 49 (39.5%) |

**Supplementary Table S3:** Sub- analysis according to presence of PVT

|                               | All patients | With PVT (n=75) | No-PVT (n = 125) | P-value |
|-------------------------------|--------------|-----------------|------------------|---------|
| <b>Fulfil Baveno criteria</b> | 41 (20.5%)   | 11 (14.7%)      | 30 (24%)         | 0.113   |
| <b>VNT missed rate (n=41)</b> | 7 (3.5%)     | 2 (1%)          | 5 (2.5%)         | 1.000   |

**Supplementary Table S4:** Sub-analysis according to right or non-right sided tumour involvement

|                                           | All patients | Right sided involvement (n = 91) | Non-right sided involvement (n = 109) | P-value |
|-------------------------------------------|--------------|----------------------------------|---------------------------------------|---------|
| <b>VNT count</b>                          | 45 (22.5%)   | 23 (25.3%)                       | 22 (20.2%)                            | 0.391   |
| <b>Fulfil Baveno criteria (n=41)</b>      | 7 (17.1%)    | 5 (19.2%)                        | 2 (13.3%)                             | 1.000   |
| <b>Not fulfil Baveno criteria (n=159)</b> | 38 (23.9%)   | 18 (27.7%)                       | 20 (21.3%)                            | 0.351   |

**Supplementary Table S5:** Sub-analysis according to different alternative treatments

|                                             | Partial hepatectomy | TACE     | RF ablation | No treatment |
|---------------------------------------------|---------------------|----------|-------------|--------------|
| <b>Fulfil Baveno criteria (n =41)</b>       | 10                  | 12       | 2           | 4            |
| <b>VNT:</b>                                 | 1 (0.5%)            | 3 (1.5%) | 0 (0%)      | 0 (0%)       |
| <b>Not fulfil Baveno criteria (n = 159)</b> | 10                  | 37       | 4           | 45           |
| <b>VNT:</b>                                 | 2 (1%)              | 14 (7%)  | 2 (1%)      | 7 (3.5%)     |
